# Supplementary material
Source: PubMed Central journal article supplement (PMC5564179)
Supplement: NIHMS892758-supplement-Supplement.pdf [file NIHMS892758-supplement-Supplement.pdf]

## Supplementary Online Content

Pearlman R, Frankel WL, Swanson B, et al. Prevalence and spectrum of germline cancer susceptibility gene mutations among patients with early-onset colorectal cancer. *JAMA Oncol*. Published online December 15, 2016. doi:10.1001/jamaoncol.2016.5194.

**eTable 1.** Ohio Colorectal Cancer Prevention Initiative Participating Hospitals

**eTable 2.** Variants of Uncertain Significance

**eTable 3.** Genotypes and Phenotypes of Patients with a Hereditary Cancer Syndrome

**eTable 4.** Patients Explained by Double Somatic Mutations

This supplementary material has been provided by the authors to give readers additional information about their work.

**Prevalence and spectrum of germline cancer susceptibility gene mutations among early-onset colorectal cancer patients**

**ON-LINE ONLY SUPPLEMENTAL MATERIAL**

**eTable 1. Ohio Colorectal Cancer Prevention Initiative Participating Hospitals**

**eTable 2. Variants of Uncertain Significance**

**eTable 3. Genotypes and Phenotypes of Patients with a Hereditary Cancer Syndrome**

**eTable 4. Patients Explained by Double Somatic Mutations**

**eTable 1. Ohio Colorectal Cancer Prevention Initiative Participating Hospitals**

| Hospital                             | City        | Hospital                                | City             |
|--------------------------------------|-------------|-----------------------------------------|------------------|
| Akron General Medical Center         | Akron       | Wright-Patterson Medical Center         | Dayton           |
| Summa Akron City/St. Thomas Hospital | Akron       | Grady Memorial Hospital                 | Delaware         |
| Summa Barberton Hospital             | Barberton   | Mercy Fairfield Hospital                | Fairfield        |
| Mercy Clermont Hospital              | Batavia     | Blanchard Valley Regional Health Center | Findlay          |
| Aultman Hospital                     | Canton      | Wayne Hospital                          | Greenville       |
| Mercy Medical Center                 | Canton      | Fairfield Medical Center                | Lancaster        |
| Adena Health System                  | Chillicothe | St. Rita's Medical Center               | Lima             |
| Bethesda North Hospital- TriHealth   | Cincinnati  | MedCentral Health System                | Mansfield        |
| Good Samaritan Hospital- TriHealth   | Cincinnati  | Marietta Memorial Hospital              | Marietta         |
| Mercy Anderson Hospital              | Cincinnati  | Marion General Hospital                 | Marion           |
| Mercy West Hospital                  | Cincinnati  | St. Luke's Hospital <sup>a</sup>        | Maumee           |
| The Christ Hospital                  | Cincinnati  | Hillcrest Hospital                      | Mayfield Heights |
| The Jewish Hospital                  | Cincinnati  | Atrium Medical Center                   | Middletown       |
| Cleveland Clinic Foundation          | Cleveland   | Knox Community Hospital                 | Mount Vernon     |
| Fairview Hospital                    | Cleveland   | Licking Memorial Hospital               | Newark           |
| MetroHealth System                   | Cleveland   | Southern Ohio Medical Center            | Portsmouth       |
| Doctors Hospital West                | Columbus    | Robinson Memorial Hospital              | Ravenna          |
| Grant Medical Center                 | Columbus    | Springfield Regional Medical Center     | Springfield      |
| Mount Carmel East                    | Columbus    | ProMedica Flower Hospital               | Sylvania         |

© 2016 American Medical Association. All rights reserved.

|                              |                |                             |                      |
|------------------------------|----------------|-----------------------------|----------------------|
| Mount Carmel West            | Columbus       | ProMedica Toledo Hospital   | Toledo               |
| Ohio State University        | Columbus       | Toledo Clinic Cancer Center | Toledo               |
| Riverside Methodist Hospital | Columbus       | Upper Valley Medical Center | Troy                 |
| Summa Western Reserve        | Cuyahoga Falls | South Pointe Hospital       | Warrensville Heights |
| Good Samaritan Hospital      | Dayton         | Mount Carmel St. Ann's      | Westerville          |
| Kettering Medical Center     | Dayton         | Genesis Healthcare System   | Zanesville           |
| Miami Valley Hospital        | Dayton         |                             |                      |

<sup>a</sup>Participation ended 12/31/2015

**eTable 2. Variants of Uncertain Significance**

| Patient # | Sex    | Age | Colon cancer site     | Clinical history  | MMR tumor status       | Gene       | Nucleotide change         | Protein change | Additional pathogenic mutation        |
|-----------|--------|-----|-----------------------|-------------------|------------------------|------------|---------------------------|----------------|---------------------------------------|
| 369352    | Female | 39  | Rectosigmoid junction |                   | Proficient             | <i>APC</i> | 7.5kb deletion promoter1A |                |                                       |
| 366535    | Male   | 40  | Cecum                 |                   | Deficient <sup>a</sup> | <i>APC</i> | c.295C>T                  | p.R99W         |                                       |
| 398305    | Female | 47  | Sigmoid               |                   | Proficient             | <i>APC</i> | c.1243G>A                 | p.A415T        |                                       |
| 369365    | Female | 30  | Ascending             |                   | Proficient             | <i>APC</i> | c.1606G>A                 | p.E536K        |                                       |
| 449571    | Female | 39  | Cecum                 |                   | Proficient             | <i>APC</i> | c.1825G>A                 | p.V609I        |                                       |
| 362916    | Male   | 46  | Rectum                |                   | Proficient             | <i>APC</i> | c.2209T>C                 | p.Y737H        |                                       |
| 362971    | Male   | 48  | Left colon            |                   | Proficient             | <i>APC</i> | c.3352A>G                 | p.N1118D       | <i>BRCA2</i> c.5946del, p.S1982Rfs*22 |
| 455734    | Female | 32  | Cecum                 |                   | Proficient             | <i>APC</i> | c.3650A>C                 | p.N1217T       |                                       |
| 448728    | Female | 44  | Sigmoid               |                   | Proficient             | <i>APC</i> | c.3653C>T                 | p.T1218M       |                                       |
| 363017    | Female | 49  | Rectosigmoid junction |                   | Proficient             | <i>APC</i> | c.4325C>G                 | p.P1442R       | <i>APC</i> c.1213C>T, p.R405X         |
| 362916    | Male   | 46  | Rectum                |                   | Proficient             | <i>APC</i> | c.4919G>A                 | p.R1640Q       |                                       |
| 400625    | Male   | 49  | Sigmoid               |                   | Proficient             | <i>APC</i> | c.5879C>T                 | p.P1960L       |                                       |
| 417730    | Female | 44  | Splenic flexure       |                   | Proficient             | <i>APC</i> | c.6363_6365 dupTGC        | p.A2122dup     |                                       |
| 451469    | Male   | 40  | Transverse            |                   | Proficient             | <i>APC</i> | c.6473C>G                 | p.P2158R       |                                       |
| 426470    | Male   | 29  | Sigmoid               |                   | Proficient             | <i>APC</i> | c.6782C>T                 | p.P2261L       |                                       |
| 500601    | Male   | 47  | Rectum                |                   | Proficient             | <i>APC</i> | c.7174C>T                 | p.P2393S       |                                       |
| 456269    | Female | 49  | Cecum                 |                   | Proficient             | <i>APC</i> | c.7832C>T                 | p.T2611I       |                                       |
| 410925    | Male   | 37  | Sigmoid               | Thyroid cancer 39 | Proficient             | <i>APC</i> | c.8182G>A                 | p.V2728M       |                                       |
| 362983    | Female | 43  | Sigmoid               |                   | Proficient             | <i>APC</i> | c.8261G>A                 | p.S2754N       |                                       |
| 366727    | Female | 32  | Rectum                |                   | Proficient             | <i>ATM</i> | c.712A>G                  | p.I238V        |                                       |
| 441033    | Female | 45  | Rectum                |                   | Proficient             | <i>ATM</i> | c.1138T>A                 | p.Y380N        |                                       |
| 418764    | Female | 31  | Rectum                |                   | Proficient             | <i>ATM</i> | c.2096A>G                 | p.E699G        |                                       |
| 365403    | Male   | 37  | Transverse            |                   | Deficient              | <i>ATM</i> | c.2260C>A                 | p.Q754K        | <i>PMS2</i> c.1831dup, p.I611Nfs*2    |
| 430326    | Male   | 45  | Ascending             |                   | Proficient             | <i>ATM</i> | c.2770C>T                 | p.R924W        |                                       |
| 453447    | Female | 41  | Ascending             |                   | Proficient             | <i>ATM</i> | c.2804C>T                 | p.T935M        |                                       |

**eTable 2. Variants of Uncertain Significance**

| Patient # | Sex    | Age | Colon cancer site     | Clinical history | MMR tumor status       | Gene | Nucleotide change     | Protein change         | Additional pathogenic mutation                  |
|-----------|--------|-----|-----------------------|------------------|------------------------|------|-----------------------|------------------------|-------------------------------------------------|
| 450179    | Female | 39  | Sigmoid               |                  | Proficient             | ATM  | c.3151G>C             | p.E1051Q               |                                                 |
| 448651    | Male   | 40  | Rectosigmoid junction |                  | Deficient <sup>a</sup> | ATM  | c.3781A>G             | p.I1261V               |                                                 |
| 413049    | Female | 49  | Left colon            |                  | Proficient             | ATM  | c.4256_4258 delinsCTT | p.L1419_L1420 delinsPF |                                                 |
| 369721    | Female | 44  | Not specified         |                  | Proficient             | ATM  | c.4362A>C             | p.K1454N               |                                                 |
| 414440    | Female | 47  | Rectosigmoid junction |                  | Proficient             | ATM  | c.4402G>A             | p.V1468I               |                                                 |
| 365576    | Female | 47  | Cecum                 |                  | Proficient             | ATM  | c.4424A>G             | p.Y1475C               |                                                 |
| 435516    | Female | 43  | Rectum                |                  | Proficient             | ATM  | c.4534G>A             | p.A1512T               |                                                 |
| 402047    | Male   | 47  | Hepatic flexure       |                  | Proficient             | ATM  | c.4687G>A             | p.D1563N               |                                                 |
| 500396    | Female | 43  | Rectum                |                  | Proficient             | ATM  | c.4724G>A             | p.R1575H               |                                                 |
| 448728    | Female | 44  | Sigmoid               |                  | Proficient             | ATM  | c.4768C>T             | p.L1690F               |                                                 |
| 450705    | Male   | 33  | Hepatic flexure       |                  | Proficient             | ATM  | c.5228C>T             | p.T1743I               |                                                 |
| 365558    | Male   | 47  | Cecum                 |                  | Proficient             | ATM  | c.5278A>G             | p.M1760V               |                                                 |
| 500396    | Female | 43  | Rectum                |                  | Proficient             | ATM  | c.6820G>A             | p.A2274T               |                                                 |
| 453934    | Female | 37  | Rectum                |                  | Proficient             | ATM  | c.7122A>T             | p.E2374D               |                                                 |
| 364086    | Female | 44  | Splenic flexure       |                  | Proficient             | ATM  | c.7381C>T             | p.R2461C               |                                                 |
| 459709    | Female | 34  | Ascending             |                  | Deficient              | ATM  | c.7390T>C             | p.C2464R               | Constitutional <i>MLH1</i> promoter methylation |
| 434678    | Male   | 47  | Sigmoid               |                  | Proficient             | ATM  | c.7492T>G             | p.S2498A               |                                                 |
| 364392    | Female | 34  | Rectosigmoid junction |                  | Deficient              | ATM  | c.7592T>C             | p.M2531T               | <i>MLH1</i> c.1279C>T, p.Q427X                  |
| 454645    | Female | 40  | Rectum                |                  | Proficient             | ATM  | c.7618G>A             | p.V2540I               |                                                 |
| 451474    | Male   | 43  | Ascending             |                  | Proficient             | ATM  | c.8129A>G             | p.K2710R               |                                                 |
| 362913    | Male   | 47  | Transverse            |                  | Proficient             | ATM  | c.8261C>T             | p.T2754I               |                                                 |
| 410926    | Male   | 39  | Rectum                |                  | Proficient             | ATM  | c.9086G>A             | p.G3029D               |                                                 |
| 416288    | Female | 45  | Rectum                |                  | Proficient             | ATM  | exon 61-62 dup        |                        |                                                 |
| 423987    | Female | 46  | Hepatic flexure       |                  | Proficient             | ATM  | exon 61-62 dup        |                        |                                                 |

**eTable 2. Variants of Uncertain Significance**

| Patient # | Sex    | Age | Colon cancer site     | Clinical history  | MMR tumor status | Gene          | Nucleotide change | Protein change | Additional pathogenic mutation         |
|-----------|--------|-----|-----------------------|-------------------|------------------|---------------|-------------------|----------------|----------------------------------------|
| 455498    | Male   | 48  | Rectum                |                   | Proficient       | <i>BARD1</i>  | c.33G>T           | p.Q11H         |                                        |
| 457640    | Male   | 48  | Ascending             |                   | Proficient       | <i>BARD1</i>  | c.568G>A          | p.A190T        |                                        |
| 390026    | Female | 44  | Left colon            |                   | Proficient       | <i>BARD1</i>  | c.773T>C          | p.I258T        |                                        |
| 453292    | Female | 43  | Sigmoid               |                   | Proficient       | <i>BARD1</i>  | c.841C>T          | p.P281S        |                                        |
| 404905    | Female | 47  | Ascending             |                   | Proficient       | <i>BARD1</i>  | c.1314G>A         | p.K438K        |                                        |
| 362917    | Male   | 31  | Sigmoid               |                   | Proficient       | <i>BARD1</i>  | c.1429G>A         | p.V477M        |                                        |
| 369365    | Female | 30  | Ascending             |                   | Proficient       | <i>BARD1</i>  | c.2191C>G         | p.R731G        |                                        |
| 453612    | Male   | 34  | Ascending             |                   | Proficient       | <i>BARD1</i>  | c.2209A>G         | p.I737V        |                                        |
| 435548    | Female | 39  | Sigmoid               |                   | Proficient       | <i>BMPR1A</i> | c.995T>C          | p.L332P        |                                        |
| 450705    | Male   | 33  | Hepatic flexure       |                   | Proficient       | <i>BMPR1A</i> | c.1058A>G         | p.Q353R        |                                        |
| 407850    | Female | 47  | Rectosigmoid junction |                   | Proficient       | <i>BMPR1A</i> | c.1433G>A         | p.R478H        |                                        |
| 440168    | Male   | 42  | Rectum                |                   | Proficient       | <i>BRCA2</i>  | c.620C>T          | p.T207I        |                                        |
| 418764    | Female | 31  | Rectum                |                   | Proficient       | <i>BRCA2</i>  | c.3194T>C         | p.I1065T       |                                        |
| 388606    | Female | 39  | Rectosigmoid junction |                   | Proficient       | <i>BRCA2</i>  | c.6792G>C         | p.L2264F       |                                        |
| 458435    | Female | 37  | Rectum                |                   | Proficient       | <i>BRCA2</i>  | c.6817A>G         | p.R2273G       |                                        |
| 364010    | Male   | 47  | Sigmoid               |                   | Proficient       | <i>BRCA2</i>  | c.8204C>G         | p.P2735R       |                                        |
| 362916    | Male   | 46  | Rectum                |                   | Proficient       | <i>BRCA2</i>  | c.8417C>T         | p.S2806L       |                                        |
| 248119    | Male   | 39  | Cecum                 |                   | Proficient       | <i>BRCA2</i>  | c.9206G>T         | p.C3069F       | <i>SMAD4</i> c.430_431del, p.S144Rfs*7 |
| 416287    | Female | 43  | Sigmoid               | Breast cancer 42  | Proficient       | <i>BRCA2</i>  | c.9608A>G         | p.Y3203C       |                                        |
| 404530    | Male   | 48  | Cecum                 |                   | Deficient        | <i>BRIP1</i>  | c.139C>G          | p.P47A         | <i>MSH2</i> c.942+3A>T                 |
| 404445    | Female | 48  | Sigmoid               |                   | Proficient       | <i>BRIP1</i>  | c.316C>T          | p.R106C        |                                        |
| 429807    | Female | 32  | Rectum                | Thyroid cancer 32 | Proficient       | <i>BRIP1</i>  | c.317G>A          | p.R106H        | <i>APC</i> c.1759del, p.S587Afs*3      |
| 366716    | Male   | 33  | Right colon           |                   | Deficient        | <i>BRIP1</i>  | c.485G>A          | p.R162Q        | <i>MLH1</i> c.200G>A, p.G72E           |
| 500685    | Male   | 34  | Ascending             |                   | Deficient        | <i>BRIP1</i>  | c.628C>T          | p.P210S        | <i>MLH1</i> c.1381A>T, p.K461X         |
| 451255    | Male   | 44  | Rectosigmoid junction |                   | Proficient       | <i>BRIP1</i>  | c.790C>T          | p.R264W        |                                        |
| 458453    | Male   | 48  | Rectum                |                   | Proficient       | <i>BRIP1</i>  | c.1871C>T         | p.S624L        |                                        |

**eTable 2. Variants of Uncertain Significance**

| Patient # | Sex    | Age | Colon cancer site     | Clinical history      | MMR tumor status | Gene                     | Nucleotide change | Protein change | Additional pathogenic mutation  |
|-----------|--------|-----|-----------------------|-----------------------|------------------|--------------------------|-------------------|----------------|---------------------------------|
| 429729    | Male   | 48  | Rectosigmoid junction |                       | Proficient       | <i>BRIP1</i>             | c.2220G>T         | p.Q740H        |                                 |
| 416373    | Male   | 43  | Transverse            |                       | Proficient       | <i>BRIP1</i>             | c.2440C>T         | p.R814C        |                                 |
| 369568    | Female | 45  | Rectum                |                       | Proficient       | <i>BRIP1</i>             | c.3079G>A         | p.E1027K       |                                 |
| 413103    | Male   | 49  | Sigmoid               |                       | Proficient       | <i>BRIP1</i>             | c.3104G>A         | p.R1035H       |                                 |
| 500601    | Male   | 47  | Rectum                |                       | Proficient       | <i>BRIP1</i>             | c.3149C>A         | p.T1050N       |                                 |
| 426530    | Female | 22  | Transverse            |                       | Proficient       | <i>BRIP1</i>             | c.3378A>C         | p.E1126D       |                                 |
| 456891    | Male   | 49  | Ascending, Ascending  | Synchronous primaries | Proficient       | <i>CDH1</i>              | c.88C>A           | p.P30T         |                                 |
| 406767    | Male   | 32  | Sigmoid               |                       | Proficient       | <i>CDH1</i>              | c.88C>A           | p.P30T         |                                 |
| 454110    | Female | 46  | Ascending             |                       | Proficient       | <i>CDH1</i>              | c.1138-3C>T       |                |                                 |
| 409270    | Female | 46  | Not specified         |                       | Proficient       | <i>CDH1</i>              | c.2074G>A         | p.A692T        |                                 |
| 443428    | Male   | 47  | Sigmoid               |                       | Proficient       | <i>CDH1</i>              | c.2165-15C>A      |                |                                 |
| 369574    | Male   | 49  | Rectum                |                       | Proficient       | <i>CDH1</i>              | c.2371C>T         | p.L791F        |                                 |
| 419770    | Female | 45  | Sigmoid               |                       | Proficient       | <i>CDH1</i>              | c.2398C>T         | p.R800C        |                                 |
| 369732    | Female | 45  | Not specified         |                       | Proficient       | <i>CDH1</i>              | c.2590G>A         | p.E864K        | <i>PALB2</i> exon 11 deletion   |
| 458435    | Female | 37  | Rectum                |                       | Proficient       | <i>CDK4</i>              | c.245G>A          | p.R82Q         |                                 |
| 435548    | Female | 39  | Sigmoid               |                       | Proficient       | <i>CDKN2A</i>            | c.-33G>C          |                |                                 |
| 445556    | Male   | 46  | Sigmoid               | Prostate cancer 45    | Proficient       | <i>CDKN2A</i>            | c.-34G>C          |                |                                 |
| 363008    | Male   | 43  | Not specified         |                       | Proficient       | <i>CDKN2A</i>            | c.217A>C          | p.S73R         |                                 |
| 457689    | Male   | 28  | Rectum                |                       | Proficient       | <i>CDKN2A</i>            | c.369T>A          | p.H123Q        |                                 |
| 369345    | Female | 43  | Rectosigmoid junction |                       | Proficient       | <i>CDKN2A</i>            | c.430C>T          | p.R144C        |                                 |
| 451469    | Male   | 40  | Transverse            |                       | Proficient       | <i>CHEK2</i>             | c.-6G>A           |                |                                 |
| 453528    | Male   | 47  | Sigmoid               |                       | Proficient       | <i>CHEK2</i>             | c.61C>A           | p.P21T         |                                 |
| 440170    | Male   | 45  | Sigmoid               |                       | Proficient       | <i>CHEK2<sup>f</sup></i> | c.470T>C          | p.I157T        | <i>MUTYH</i> c.1187G>A, p.G396D |
| 452296    | Male   | 48  | Sigmoid               |                       | Proficient       | <i>CHEK2<sup>f</sup></i> | c.470T>C          | p.I157T        |                                 |
| 450268    | Male   | 44  | Rectum                |                       | Proficient       | <i>CHEK2<sup>f</sup></i> | c.470T>C          | p.I157T        |                                 |
| 393250    | Male   | 46  | Rectum                |                       | Proficient       | <i>CHEK2<sup>f</sup></i> | c.470T>C          | p.I157T        |                                 |
| 429729    | Male   | 48  | Rectosigmoid junction |                       | Proficient       | <i>CHEK2<sup>f</sup></i> | c.470T>C          | p.I157T        |                                 |



**eTable 2. Variants of Uncertain Significance**

| Patient # | Sex    | Age | Colon cancer site                   | Clinical history          | MMR tumor status | Gene                      | Nucleotide change  | Protein change | Additional pathogenic mutation            |
|-----------|--------|-----|-------------------------------------|---------------------------|------------------|---------------------------|--------------------|----------------|-------------------------------------------|
| 448624    | Female | 42  | Sigmoid                             | Thyroid cancer 42         | Proficient       | <i>CHEK2</i> <sup>f</sup> | c.470T>C           | p.I157T        |                                           |
| 417427    | Male   | 44  | Sigmoid                             |                           | Proficient       | <i>CHEK2</i>              | c.539G>A           | p.R180H        |                                           |
| 72270     | Female | 39  | Cecum                               |                           | Proficient       | <i>CHEK2</i>              | c.592+3A>T         |                |                                           |
| 442447    | Male   | 46  | Rectum                              |                           | Proficient       | <i>CHEK2</i>              | c.593-20_593-18del |                |                                           |
| 409270    | Female | 46  | Not specified                       |                           | Proficient       | <i>CHEK2</i>              | c.661A>G           | p.L221V        |                                           |
| 448307    | Female | 47  | Rectum                              |                           | Proficient       | <i>CHEK2</i>              | c.751A>T           | p.I251F        | <i>BRCA2</i> c.1755_1759del, p.K585Nfs*3  |
| 455368    | Female | 31  | Rectum                              |                           | Proficient       | <i>CHEK2</i>              | c.1091T>C          | p.I364T        |                                           |
| 455905    | Female | 38  | Rectum                              |                           | Proficient       | <i>CHEK2</i>              | c.1336A>G          | p.N446D        |                                           |
| 451469    | Male   | 40  | Transverse                          |                           | Proficient       | <i>CHEK2</i>              | c.1343T>G          | p.I448S        |                                           |
| 369568    | Female | 45  | Rectum                              |                           | Proficient       | <i>CHEK2</i>              | c.1343T>G          | p.I448S        |                                           |
| 442888    | Male   | 20  | Ascending                           |                           | Proficient       | <i>CHEK2</i>              | c.1343T>G          | p.I448S        |                                           |
| 408570    | Female | 48  | Cecum                               |                           | Deficient        | <i>MLH1</i> <sup>e</sup>  | c.207+5G>C         |                |                                           |
| 442522    | Female | 47  | Sigmoid                             |                           | Proficient       | <i>MLH1</i>               | c.1887A>T          | p.E629D        |                                           |
| 418090    | Female | 49  | Sigmoid                             |                           | Proficient       | <i>MLH1</i> <sup>f</sup>  | c.1897-2A>G        |                |                                           |
| 363001    | Female | 39  | Transverse, Rectum                  | Synchronous primaries     | Proficient       | <i>MSH2</i>               | c.80C>A            | p.P27Q         |                                           |
| 364370    | Female | 46  | Rectum                              | Colon cancer 28           | Deficient        | <i>MSH2</i>               | c.80C>T            | p.P27L         | <i>MLH1</i> c.2252_2253delAA, p.K751Sfs*3 |
| 366413    | Male   | 48  | Ascending, Splenic flexure, Sigmoid | Synchronous primaries (3) | Deficient        | <i>MSH2</i>               | c.557A>G           | p.N186S        | <i>MSH2</i> c.2096C>A, p.S699X            |
| 365558    | Male   | 47  | Cecum                               |                           | Proficient       | <i>MSH2</i>               | c.894G>C           | p.Q298H        |                                           |
| 430190    | Male   | 37  | Hepatic flexure                     |                           | Deficient        | <i>MSH2</i> <sup>d</sup>  | c.1832T>A          | p.V611E        |                                           |
| 434827    | Female | 44  | Rectosigmoid junction               | Multiple polyps           | Proficient       | <i>MSH6</i>               | c.257C>T           | p.T86I         |                                           |
| 445718    | Male   | 42  | Descending                          |                           | Deficient        | <i>MSH6</i> <sup>c</sup>  | c.1109T>C          | p.L370S        |                                           |
| 409370    | Female | 46  | Sigmoid                             |                           | Proficient       | <i>MSH6</i>               | c.1211A>G          | p.N404S        |                                           |
| 438833    | Female | 47  | Sigmoid                             |                           | Proficient       | <i>MSH6</i>               | c.1915G>A          | p.E639K        |                                           |

**eTable 2. Variants of Uncertain Significance**

| Patient # | Sex    | Age | Colon cancer site     | Clinical history                                | MMR tumor status       | Gene                     | Nucleotide change | Protein change | Additional pathogenic mutation  |
|-----------|--------|-----|-----------------------|-------------------------------------------------|------------------------|--------------------------|-------------------|----------------|---------------------------------|
| 449664    | Female | 42  | Sigmoid               |                                                 | Proficient             | <i>MSH6</i>              | c.3203G>A         | p.R1068Q       |                                 |
| 456049    | Female | 42  | Cecum                 |                                                 | Proficient             | <i>MSH6</i>              | c.3649A>G         | p.R1217G       |                                 |
| 448624    | Female | 42  | Sigmoid               | Thyroid cancer 42                               | Proficient             | <i>MUTYH</i>             | c.607C>T          | p.R203C        |                                 |
| 409270    | Female | 46  | Not specified         |                                                 | Proficient             | <i>MUTYH</i>             | c.625A>G          | p.I209V        |                                 |
| 362938    | Male   | 39  | Ascending             | 4 adenomas, multiple hyperplastic rectal polyps | Deficient <sup>a</sup> | <i>MUTYH<sup>b</sup></i> | c.698G>A          | p.G233D        | <i>MUTYH</i> c.1187G>A, p.G396D |
| 404905    | Female | 47  | Ascending             |                                                 | Proficient             | <i>MUTYH</i>             | c.890G>A          | p.R297K        |                                 |
| 406808    | Male   | 48  | Rectosigmoid junction |                                                 | Proficient             | <i>MUTYH</i>             | c.1435-17C>G      |                |                                 |
| 362214    | Female | 37  | Rectosigmoid junction |                                                 | Proficient             | <i>NBN</i>               | c.-16del          |                |                                 |
| 362998    | Female | 30  | Sigmoid               |                                                 | Proficient             | <i>NBN</i>               | c.224G>C          | p.G75A         |                                 |
| 456140    | Male   | 31  | Sigmoid               |                                                 | Proficient             | <i>NBN</i>               | c.456G>A          | p.M152I        |                                 |
| 458035    | Male   | 48  | Rectum                |                                                 | Proficient             | <i>NBN</i>               | c.643C>T          | p.R215W        |                                 |
| 419770    | Female | 45  | Sigmoid               |                                                 | Proficient             | <i>NBN</i>               | c.643C>T          | p.R215W        |                                 |
| 442888    | Male   | 20  | Ascending             |                                                 | Proficient             | <i>NBN</i>               | c.786C>A          | p.F262L        |                                 |
| 410248    | Male   | 30  | Ascending             |                                                 | Proficient             | <i>NBN</i>               | c.1222A>G         | p.K408E        |                                 |
| 365376    | Male   | 39  | Cecum                 |                                                 | Proficient             | <i>NBN</i>               | c.1484C>T         | p.P495L        |                                 |
| 399411    | Male   | 46  | Rectum                |                                                 | Proficient             | <i>NBN</i>               | c.1720T>A         | p.L574I        |                                 |
| 453447    | Female | 41  | Ascending             |                                                 | Proficient             | <i>NBN</i>               | c.1729G>T         | p.D577Y        |                                 |
| 423046    | Male   | 49  | Cecum                 |                                                 | Proficient             | <i>PALB2</i>             | c.20A>G           | p.K7R          |                                 |
| 365554    | Male   | 34  | Sigmoid               |                                                 | Proficient             | <i>PALB2</i>             | c.110G>A          | p.R37H         |                                 |
| 455786    | Female | 36  | Ascending, Ascending  | Synchronous primaries                           | Proficient             | <i>PALB2</i>             | c.1213C>G         | p.P405A        |                                 |
| 423046    | Male   | 49  | Cecum                 |                                                 | Proficient             | <i>PALB2</i>             | c.2057G>A         | p.R686K        |                                 |
| 448188    | Female | 46  | Sigmoid               |                                                 | Proficient             | <i>PALB2</i>             | c.3073G>A         | p.A1025T       |                                 |
| 451255    | Male   | 44  | Rectosigmoid junction |                                                 | Proficient             | <i>PALB2</i>             | c.3418T>G         | p.W1140G       |                                 |
| 365590    | Female | 43  | Left colon            |                                                 | Proficient             | <i>PALB2</i>             | c.3449T>G         | p.L1150R       |                                 |
| 407851    | Male   | 39  | Rectum                |                                                 | Proficient             | <i>PALB2</i>             | c.3449T>G         | p.L1150R       |                                 |
| 448650    | Male   | 38  | Rectum                |                                                 | Proficient             | <i>PMS2</i>              | c.149G>A          | p.G50D         |                                 |

© 2016 American Medical Association. All rights reserved.

**eTable 2. Variants of Uncertain Significance**

| Patient # | Sex    | Age | Colon cancer site     | Clinical history      | MMR tumor status | Gene                     | Nucleotide change | Protein change | Additional pathogenic mutation |
|-----------|--------|-----|-----------------------|-----------------------|------------------|--------------------------|-------------------|----------------|--------------------------------|
| 423828    | Male   | 49  | Ascending             |                       | Deficient        | <i>PMS2</i> <sup>d</sup> | c.215G>A          | p.G72E         |                                |
| 426810    | Male   | 41  | Cecum                 |                       | Deficient        | <i>PMS2</i>              | c.322G>T          | p.G108W        | <i>APC</i> c.3920T>A, p.I1307K |
| 458448    | Male   | 47  | Rectosigmoid junction |                       | Proficient       | <i>PMS2</i>              | c.884G>A          | p.R295Q        |                                |
| 369365    | Female | 30  | Ascending             |                       | Proficient       | <i>PMS2</i>              | c.1199A>C         | p.Q400P        |                                |
| 426530    | Female | 22  | Transverse            |                       | Proficient       | <i>PMS2</i>              | c.1280G>A         | p.R427H        |                                |
| 369787    | Male   | 46  | Rectum                |                       | Proficient       | <i>PMS2</i>              | c.1715C>T         | p.A572V        |                                |
| 406585    | Female | 48  | Right colon           |                       | Proficient       | <i>PMS2</i>              | c.1723A>G         | p.N575D        |                                |
| 417591    | Male   | 44  | Transverse            |                       | Deficient        | <i>PMS2</i>              | c.2149G>A         | p.V717M        | <i>MLH1</i> c.589-2A>G         |
| 423527    | Female | 44  | Sigmoid               |                       | Proficient       | <i>PMS2</i>              | c.2149G>A         | p.V717M        |                                |
| 406585    | Female | 48  | Right colon           |                       | Proficient       | <i>PMS2</i>              | c.2386G>A         | p.V796I        |                                |
| 434829    | Female | 48  | Sigmoid               |                       | Proficient       | <i>PMS2</i>              | c.2438G>T         | p.R813L        |                                |
| 453509    | Male   | 39  | Rectum                |                       | Proficient       | <i>PMS2</i>              | c.2438G>T         | p.R813L        |                                |
| 417427    | Male   | 44  | Sigmoid               |                       | Proficient       | <i>PTEN</i>              | c.78C>T           | p.T26T         |                                |
| 453447    | Female | 41  | Ascending             |                       | Proficient       | <i>PTEN</i>              | c.210-7_210-3del  |                |                                |
| 365168    | Male   | 37  | Sigmoid               |                       | Proficient       | <i>RAD51C</i>            | c.730A>G          | p.I244V        |                                |
| 401998    | Female | 37  | Ascending, Transverse | Synchronous primaries | Proficient       | <i>RAD51C</i>            | c.790G>A          | p.G264S        |                                |
| 426973    | Female | 49  | Ascending             |                       | Proficient       | <i>RAD51C</i>            | c.790G>A          | p.G264S        |                                |
| 448723    | Male   | 44  | Rectum                |                       | Proficient       | <i>RAD51C</i>            | c.790G>A          | p.G264S        |                                |
| 458632    | Female | 44  | Rectosigmoid junction |                       | Proficient       | <i>RAD51D</i>            | c.1A>G            | p.M1?          |                                |
| 423191    | Female | 37  | Rectosigmoid junction |                       | Proficient       | <i>RAD51D</i>            | c.629C>T          | p.A210V        |                                |
| 367050    | Female | 43  | Cecum                 |                       | Proficient       | <i>RAD51D</i>            | c.797G>A          | p.R266H        |                                |
| 401998    | Female | 37  | Ascending, Transverse | Synchronous primaries | Proficient       | <i>SMAD4</i>             | c.554C>A          | p.P185Q        |                                |
| 364090    | Female | 46  | Sigmoid               | Thyroid cancer 40     | Proficient       | <i>SMAD4</i>             | c.677C>T          | p.A226V        |                                |
| 455786    | Female | 36  | Ascending, Ascending  | Synchronous primaries | Proficient       | <i>STK11</i>             | c.929G>A          | p.R310Q        |                                |
| 402247    | Female | 38  | Rectosigmoid          |                       | Proficient       | <i>STK11</i>             | c.1168G>A         | p.V390M        |                                |

**eTable 2. Variants of Uncertain Significance**

| Patient # | Sex    | Age | Colon cancer site | Clinical history | MMR tumor status | Gene        | Nucleotide change | Protein change | Additional pathogenic mutation |
|-----------|--------|-----|-------------------|------------------|------------------|-------------|-------------------|----------------|--------------------------------|
|           |        |     | junction          |                  |                  |             |                   |                |                                |
| 404905    | Female | 47  | Ascending         |                  | Proficient       | <i>TP53</i> | c.173C>G          | p.P58R         |                                |
| 417590    | Male   | 38  | Rectum            |                  | Proficient       | <i>TP53</i> | c.800G>A          | p.R267Q        |                                |

Abbreviations: MMR, mismatch repair

MMR deficient tumor = microsatellite instability and/or abnormal immunohistochemistry, MMR proficient tumor = microsatellite stability and/or normal immunohistochemistry

<sup>a</sup>Double somatic mutations explained MMR deficient tumor

<sup>b</sup>Variant reclassified to likely pathogenic after segregation analysis

<sup>c</sup>Variant reclassified to pathogenic after extensive segregation analysis

<sup>d</sup>Variant reclassified to likely pathogenic after somatic testing

<sup>e</sup>Variant reclassified to pathogenic after RNA studies

<sup>f</sup>The classification of pathogenicity of this mutation varies by laboratory

**eTable 3. Genotypes and Phenotypes of Patients with a Hereditary Cancer Syndrome**

| Patient # | Sex    | Age | Clinical history                                         | MMR tumor status <sup>f</sup> | Gene         | Nucleotide change | Protein change | Family history <sup>d</sup>                                                                                                                                          | Met NCCN criteria <sup>g</sup> |
|-----------|--------|-----|----------------------------------------------------------|-------------------------------|--------------|-------------------|----------------|----------------------------------------------------------------------------------------------------------------------------------------------------------------------|--------------------------------|
| 365557    | Male   | 20  | Known mutation in family.                                | Deficient                     | <i>MSH2</i>  | c.1749dupT        | p.I584Yfs*14   | Father <sup>a</sup> colon 48; Pat. grandfather colon 67, pancreatic 81                                                                                               | Y                              |
| 417965    | Female | 21  | Polyposis. Known mutation in family.                     | Proficient                    | <i>APC</i>   | c.2804dupA        | p.Y935X        | Mother <sup>a</sup> FAP; Mat. grandfather <sup>a</sup> colon 30s, FAP                                                                                                | Y                              |
| 432465    | Female | 29  |                                                          | Deficient                     | <i>MSH2</i>  | c.2152C>T         | p.Q718X        | Mother endometrial 52; Mat. grandmother ovarian 42; Pat. uncle pancreatic 66                                                                                         | Y                              |
| 393829    | Male   | 29  | Polyposis. Known <i>APC</i> mutation.                    | Proficient                    | <i>APC</i>   | c.2377C>T         | p.Q793X        | Father <sup>a</sup> ( <i>APC</i> ) colon 20s, FAP; Mat. aunt cervical 24, multiple myeloma 50; Mat. grandmother colon and lymphoma 66; Mat. grandfather prostate 70s | Y                              |
|           |        |     |                                                          |                               | <i>PMS2</i>  | c.1281delT        | p.H428Tfs*20   |                                                                                                                                                                      | Y                              |
| 426565    | Female | 30  |                                                          | Deficient                     | <i>MSH2</i>  | c.2388delT        | p.V797Lfs*15   | Father colon 60; Pat. half-sister 1 endometrial 54; Pat. half-sister 2 thyroid 39; Pat. aunt melanoma 60s; Mat. aunt breast 47; Mat. grandmother brain 52            | Y                              |
|           |        |     |                                                          |                               | <i>MUTYH</i> | c.1187G>A         | p.G396D        |                                                                                                                                                                      | N <sup>d</sup>                 |
| 429807    | Female | 32  | Polyposis. Synchronous thyroid cancer.                   | Proficient                    | <i>APC</i>   | c.1759delA        | p.S587Afs*3    | Father colon 52, small bowel 55, FAP; Mother colon 50, Pat. aunt colon 43                                                                                            | Y                              |
| 440605    | Male   | 32  | Attenuated polyposis.                                    | Proficient                    | <i>MUTYH</i> | c.536A>G          | p.Y179C        | Brother polyps; Mother skin 60s                                                                                                                                      | Y                              |
|           |        |     |                                                          |                               | <i>MUTYH</i> | c.536A>G          | p.Y179C        |                                                                                                                                                                      |                                |
| 406486    | Male   | 32  | Synchronous primaries. Ashkenazi Jewish ancestry denied. | Proficient                    | <i>APC</i>   | c.3920T>A         | p.I1307K       | Mother cervical 35; Mat. grandmother colon 65; Pat. grandmother breast 40s                                                                                           | N <sup>d</sup>                 |
| 366716    | Male   | 33  |                                                          | Deficient                     | <i>MLH1</i>  | c.200G>A          | p.G67E         | Father colon 41; Pat. aunt                                                                                                                                           | Y                              |

**eTable 3. Genotypes and Phenotypes of Patients with a Hereditary Cancer Syndrome**

| Patient # | Sex    | Age | Clinical history     | MMR tumor status <sup>f</sup> | Gene         | Nucleotide change          | Protein change | Family history <sup>b</sup>                                                                                                          | Met NCCN criteria <sup>g</sup> |
|-----------|--------|-----|----------------------|-------------------------------|--------------|----------------------------|----------------|--------------------------------------------------------------------------------------------------------------------------------------|--------------------------------|
|           |        |     |                      |                               |              |                            |                | bladder 55; Pat. grandmother pancreatic 50s                                                                                          |                                |
| 444839    | Female | 33  | Polyposis.           | Proficient                    | <i>APC</i>   | c.3747C>A                  | p.C1249X       | None                                                                                                                                 | Y                              |
| 364392    | Female | 34  |                      | Deficient                     | <i>MLH1</i>  | c.1279C>T                  | p.Q427X        | Father <sup>a</sup> epocrine 33; Sister <sup>a</sup> endometrial 36, ovarian 36; Pat. uncle brain 60s, Pat. aunt breast age unknown  | Y                              |
| 500685    | Male   | 34  |                      | Deficient                     | <i>MLH1</i>  | c.1381A>T                  | p.K461X        | Mother hepatocellular 52                                                                                                             | Y                              |
| 459709    | Female | 34  |                      | Deficient                     | <i>MLH1</i>  | Constitutional methylation |                | None <sup>c</sup>                                                                                                                    | Y                              |
| 364390    | Male   | 35  |                      | Deficient                     | <i>MSH2</i>  | c.1885C>T                  | p.Q629X        | Father colon 56; Pat. aunt colon 50s, endometrial 50s; Pat. grandmother "abdominal cancer" 30s; Mother lung 55                       | Y                              |
| 444774    | Female | 35  | Polyposis.           | Proficient                    | <i>APC</i>   | c.4583_4587del             | p.V1528Gfs*3   | Mother FAP                                                                                                                           | Y                              |
| 440927    | Female | 35  |                      | Proficient                    | <i>MUTYH</i> | c.1187G>A                  | p.G396D        | Father lung 67, esophageal 67 <sup>c</sup>                                                                                           | N <sup>d</sup>                 |
| 453021    | Male   | 36  |                      | Proficient                    | <i>ATM</i>   | c.170G>A                   | p.W57X         | None                                                                                                                                 | N <sup>e</sup>                 |
| 410275    | Female | 36  |                      | Proficient                    | <i>ATM</i>   | exon 8 deletion            |                | Pat. half-sister "female cancer" 41; Pat. aunt 1 brain 40s; Pat. aunt 2 breast 60s; Pat. grandmother breast 50s; Mat. aunt brain 50s | N <sup>e</sup>                 |
| 365403    | Male   | 37  |                      | Deficient                     | <i>PMS2</i>  | c.1831dup                  | p.I611Nfs*2    | Mother breast 61; Mat. grandfather prostate 60s                                                                                      | Y                              |
| 430190    | Male   | 37  |                      | Deficient                     | <i>MSH2</i>  | c.1832T>A                  | p.V611E        | Mother stomach 60s; Mat. half-brother cancer site unknown 48; Pat. grandfather colon 70s                                             | Y                              |
| 369727    | Female | 38  |                      | Deficient                     | <i>MSH2</i>  | exon 8 deletion            |                | Mother <sup>a</sup> endometrial 60, colon 62; Mat. aunt colon 50; Mat. grandfather colon 20s                                         | Y                              |
| 418007    | Male   | 38  |                      | Proficient                    | <i>MUTYH</i> | c.1280_1289del             | p.W427Sfs*22   | Mother lymphoma 51                                                                                                                   | N <sup>d</sup>                 |
| 398885    | Male   | 38  |                      | Proficient                    | <i>MUTYH</i> | c.536A>G                   | p.Y179C        | Father lung 50 <sup>c</sup>                                                                                                          | N <sup>d</sup>                 |
| 362938    | Male   | 39  | 4 adenomas, multiple | Deficient                     | <i>MUTYH</i> | c.1187G>A                  | p.G396D        | Father skin 74; Brother adenomas 20s; Mat. uncle                                                                                     | N                              |
|           |        |     |                      |                               | <i>MUTYH</i> | c.698G>A                   | p.G233D        |                                                                                                                                      |                                |

**eTable 3. Genotypes and Phenotypes of Patients with a Hereditary Cancer Syndrome**

| Patient # | Sex    | Age | Clinical history                                 | MMR tumor status <sup>f</sup> | Gene         | Nucleotide change | Protein change | Family history <sup>b</sup>                                                                                                                                                   | Met NCCN criteria <sup>g</sup> |
|-----------|--------|-----|--------------------------------------------------|-------------------------------|--------------|-------------------|----------------|-------------------------------------------------------------------------------------------------------------------------------------------------------------------------------|--------------------------------|
|           |        |     | hyperplastic rectal polyps.                      |                               |              |                   |                | colon 63                                                                                                                                                                      |                                |
| 248119    | Male   | 39  | No polyps.                                       | Proficient                    | <i>SMAD4</i> | c.430_431del      | p.S144Rfs*7    | Sister mixed polyposis 35 (adenomas, hyperplastic); Mother gastric polyposis; Mat. grandmother breast 42                                                                      | N                              |
| 375800    | Male   | 40  |                                                  | Proficient                    | <i>ATM</i>   | c.8395_8404del    | p.F2799Kfs*4   | Father esophageal 26; Pat. uncle polyps 60s; Pat. grandfather colon 70; Pat. grandmother colon 51                                                                             | N <sup>e</sup>                 |
| 434386    | Female | 41  | Ashkenazi Jewish ancestry denied.                | Proficient                    | <i>APC</i>   | c.3920T>A         | p.I1307K       | Mat. uncle cancer site/age unknown; Pat. uncle pancreatic age unknown; Pat. aunt ovarian age unknown                                                                          | N <sup>d</sup>                 |
| 426810    | Male   | 41  | Ashkenazi Jewish ancestry denied.                | Deficient <sup>g</sup>        | <i>APC</i>   | c.3920T>A         | p.I1307K       | Mat. grandfather prostate age unknown                                                                                                                                         | N <sup>d</sup>                 |
| 417173    | Male   | 41  | Known mutation in family.                        | Deficient                     | <i>MSH2</i>  | exon 1-6 deletion |                | Mother <sup>a</sup> colon 43, 49; Mat. aunt ovarian 50s; Mat. uncle colon 41                                                                                                  | Y                              |
| 365417    | Male   | 41  |                                                  | Proficient                    | <i>BRCA2</i> | c.961C>T          | p.Q321X        | Father colon 68; Sister polyps 40s; Mat. uncle ureter 65, Mat. grandmother melanoma 55, pancreatic 56                                                                         | N                              |
| 362943    | Female | 42  |                                                  | Proficient                    | <i>MUTYH</i> | c.1187G>A         | p.G396D        | None <sup>c</sup>                                                                                                                                                             | N <sup>d</sup>                 |
| 362982    | Male   | 42  | Synchronous primaries. Known mutation in family. | Deficient                     | <i>MLH1</i>  | c.117-2A>G        |                | Father <sup>a</sup> colon 50s, 64; Pat. half-brother 1 colon 20s, 42; Pat. half-brother 2 colon 50s; Pat. half-sister "female cancer" 50s; Pat. grandmother colon age unknown | Y                              |
| 410711    | Male   | 42  | Synchronous primaries.                           | Deficient                     | <i>MSH2</i>  | c.1386+1G>T       |                | Mother endometrial 36; Sister endometrial 36                                                                                                                                  | Y                              |
| 445718    | Male   | 42  |                                                  | Deficient                     | <i>MSH6</i>  | c.1109 T>C        | p.L370S        | Father <sup>a</sup> appendiceal 38, prostate 45; Pat. grandmother <sup>a</sup>                                                                                                | Y                              |

**eTable 3. Genotypes and Phenotypes of Patients with a Hereditary Cancer Syndrome**

| Patient # | Sex    | Age | Clinical history                  | MMR tumor status <sup>f</sup> | Gene         | Nucleotide change | Protein change | Family history <sup>b</sup>                                                                       | Met NCCN criteria <sup>g</sup> |
|-----------|--------|-----|-----------------------------------|-------------------------------|--------------|-------------------|----------------|---------------------------------------------------------------------------------------------------|--------------------------------|
|           |        |     |                                   |                               |              |                   |                | endometrial 75; Mother endometrial 52; Mat. grandmother breast 52                                 |                                |
| 367288    | Female | 42  |                                   | Deficient                     | <i>MSH6</i>  | c.3438+1G>A       |                | None                                                                                              | Y                              |
| 430485    | Male   | 42  |                                   | Deficient                     | <i>PMS2</i>  | c.1831dup         | p.I611Nfs*2    | Mother "female cancer" 40s; Mat. aunt cancer site unknown 60; Mat. cousin brain 47                | Y                              |
| 445023    | Female | 42  | Ashkenazi Jewish ancestry denied. | Proficient                    | <i>BRCA1</i> | c.5266dupC        | p.Q1756Pfs*74  | Father <sup>a</sup> polyps 50s; Mother polyps; Pat. grandmother breast 60, ovarian 60             | Y                              |
| 452726    | Female | 43  |                                   | Deficient                     | <i>MSH2</i>  | exon 1-6 deletion |                | Mother colon 59; Sister endometrial age unknown <sup>a</sup> ; Mat. grandmother colon age unknown | Y                              |
| 432388    | Female | 44  | Synchronous primaries.            | Deficient                     | <i>MLH1</i>  | c.207+1G>A        |                | Mother colon 42, biliary tract 52, cervical 60; Sister colon 35                                   | Y                              |
| 417591    | Male   | 44  |                                   | Deficient                     | <i>MLH1</i>  | c.589-2A>G        |                | Mother thyroid age unknown, polyps; Mat. grandmother colon 30s                                    | Y                              |
| 432587    | Female | 44  |                                   | Deficient                     | <i>MSH2</i>  | c.2131C>T         | p.R711X        | Unknown, adopted                                                                                  | Y                              |
| 423450    | Male   | 44  |                                   | Deficient                     | <i>PMS2</i>  | c.2113G>A         | p.E705K        | Father melanom <sup>a</sup> 77; Pat. uncle leukemia 50s; Pat. grandmother colon 70s               | Y                              |
| 442703    | Female | 44  |                                   | Proficient                    | <i>ATM</i>   | c.7271T>G         | p.V2424G       | Father prostate 74; Mother breast 50s; Mat. grandmother breast 50s                                | N <sup>e</sup>                 |
|           |        |     |                                   |                               | <i>CHEK2</i> | c.1100del         | p.T367Mfs*15   |                                                                                                   | N <sup>e</sup>                 |
| 419748    | Female | 44  |                                   | Proficient                    | <i>BRCA2</i> | c.7069_7070del    | p.L2357Vfs*2   | Pat. grandmother cancer site/age unknown; Mat. uncle melanoma age unknown                         | N                              |
| 457664    | Female | 44  | Known mutation in the family.     | Deficient                     | <i>PMS2</i>  | c.1874delT        | p.L625X        | Pat. uncle colon 68; Pat. grandfather <sup>a</sup> colon 85                                       | Y                              |
| 448585    | Female | 44  |                                   | Proficient                    | <i>MUTYH</i> | c.1187G>A         | p.G396D        | Father lung 81; Sister breast 52; Mat. grandmother pancreatic 84; Pat.                            | N <sup>d</sup>                 |



**eTable 3. Genotypes and Phenotypes of Patients with a Hereditary Cancer Syndrome**

| Patient # | Sex    | Age | Clinical history                  | MMR tumor status <sup>f</sup> | Gene          | Nucleotide change | Protein change | Family history <sup>b</sup>                                                                                                                                                                                   | Met NCCN criteria <sup>g</sup> |
|-----------|--------|-----|-----------------------------------|-------------------------------|---------------|-------------------|----------------|---------------------------------------------------------------------------------------------------------------------------------------------------------------------------------------------------------------|--------------------------------|
|           |        |     |                                   |                               |               |                   |                | grandfather lung age unknown; Pat. uncle lung age unknown                                                                                                                                                     |                                |
| 362978    | Male   | 45  |                                   | Proficient                    | <i>CDKN2A</i> | c.9_32dup         | p.A4_P11dup    | Mother melanoma 60s, 2-3 dysplastic moles, 5 adenomas; Mat. grandmother colon 70s; Pat. uncle colon 50s                                                                                                       | N                              |
| 440170    | Male   | 45  |                                   | Proficient                    | <i>MUTYH</i>  | c.1187G>A         | p.G396D        | Sister breast 39 <sup>c</sup>                                                                                                                                                                                 | N <sup>d</sup>                 |
| 369732    | Female | 45  |                                   | Proficient                    | <i>PALB2</i>  | exon 11 deletion  |                | Father brain 69; Pat. aunt leukemia 70s                                                                                                                                                                       | N <sup>e</sup>                 |
| 455447    | Male   | 45  | Ashkenazi Jewish ancestry denied. | Proficient                    | <i>APC</i>    | c.3920T>A         | p.I1307K       | Mother breast 69, pancreatic 69; Mat. grandmother breast 55; Mat. grandfather lymphoma 30s; Pat. grandmother colon 80; Pat. grandfather prostate 60s; Pat. uncle bone 63; Pat. aunt colon 60s, lung 72        | N <sup>d</sup>                 |
| 364370    | Female | 46  | Metachronous colon cancer 28.     | Deficient                     | <i>MLH1</i>   | c.2252_2253delA A | p.K751Sfs*3    | Father colon 40; Pat. grandmother colon 29                                                                                                                                                                    | Y                              |
| 455899    | Female | 46  | Metachronous breast cancer 45.    | Proficient                    | <i>PALB2</i>  | c.758dupT         | p.S254Ifs*3    | Father lymphoma 51; Pat. aunt 1 breast 74; Pat. aunt 2 breast 65; Mat. aunt melanoma 60s; Mat. grandmother breast 60                                                                                          | N <sup>e</sup>                 |
| 362955    | Male   | 47  |                                   | Deficient                     | <i>MSH2</i>   | exon 1-6 deletion |                | Father <sup>a</sup> prostate 50s, colon 63; Pat. half-sister colon 60s; Pat. half-brother colon 60s; Pat. uncle colon 45; Pat. aunt 1 brain 56; Pat. aunt 2 ureter 50s, kidney 60s; Pat. grandfather colon 46 | Y                              |
| 405351    | Female | 47  |                                   | Deficient                     | <i>MSH2</i>   | exon 3-6 deletion |                | Mother leukemia 30s; Sister colon 50                                                                                                                                                                          | Y                              |
| 404793    | Female | 47  |                                   | Proficient                    | <i>BRCA1</i>  | c.181T>G          | p.C61G         | Father prostate 70s; Mother                                                                                                                                                                                   | Y                              |

**eTable 3. Genotypes and Phenotypes of Patients with a Hereditary Cancer Syndrome**

| Patient # | Sex    | Age | Clinical history                                                                                                            | MMR tumor status <sup>f</sup> | Gene         | Nucleotide change | Protein change | Family history <sup>b</sup>                                                                                                                                                                                           | Met NCCN criteria <sup>g</sup> |
|-----------|--------|-----|-----------------------------------------------------------------------------------------------------------------------------|-------------------------------|--------------|-------------------|----------------|-----------------------------------------------------------------------------------------------------------------------------------------------------------------------------------------------------------------------|--------------------------------|
|           |        |     |                                                                                                                             |                               |              |                   |                | breast 49, ovarian 56; Mat. aunt breast 42                                                                                                                                                                            |                                |
| 448307    | Female | 47  |                                                                                                                             | Proficient                    | <i>BRCA2</i> | c.1755_1759del    | p.K585Nfs*3    | Mat. half-sister skin 38; Father esophageal 40s; Mat. aunt 1 breast 60s; Mat. aunt 2 breast and ovarian age unknown; Mat. uncle colon 53; Mat. grandmother carcinomatosis 62; Pat. grandmother pancreatic age unknown | Y                              |
| 458192    | Female | 47  | Synchronous primaries; <i>MLH1</i> methylation absent. Metachronous endometrial cancer 49; <i>MLH1</i> methylation present. | Deficient                     | <i>MLH1</i>  | c.1635dup         | p.K546Qfs*11   | Mother bilateral breast 54                                                                                                                                                                                            | Y                              |
| 454646    | Female | 47  |                                                                                                                             | Deficient                     | <i>MLH1</i>  | c.2041G>A         | p.A681T        | None                                                                                                                                                                                                                  | Y                              |
| 195126    | Male   | 48  | Sebaceous gland cancer 45. Known mutation in family.                                                                        | Deficient                     | <i>MLH1</i>  | c.1210_1211del    | p.L404Vfs*12   | Father <sup>a</sup> colon 60; Sister rhabdomyosarcoma 27; Brother 1 colon 32, prostate 56; Brother 2 colon 60; Pat. uncle gastric; Pat. grandmother and grandfather colon age unknown                                 | Y                              |
| 443516    | Male   | 48  | Metachronous colon cancer 34.                                                                                               | Deficient                     | <i>MLH1</i>  | c.1667+1G>A       |                | Father colon 34; Sister gallbladder 41                                                                                                                                                                                | Y                              |
| 408570    | Female | 48  |                                                                                                                             | Deficient                     | <i>MLH1</i>  | c.207+5G>C        |                | Mother breast 74; Father <sup>a</sup> colon 31, 53, GE junction 73; Brother <sup>a</sup> colon 48; Sister adrenal 39, thyroid 39; Pat.                                                                                | Y                              |

**eTable 3. Genotypes and Phenotypes of Patients with a Hereditary Cancer Syndrome**

| Patient # | Sex    | Age | Clinical history                                          | MMR tumor status <sup>f</sup> | Gene         | Nucleotide change   | Protein change | Family history <sup>b</sup>                                                                                                                                                                      | Met NCCN criteria <sup>g</sup> |
|-----------|--------|-----|-----------------------------------------------------------|-------------------------------|--------------|---------------------|----------------|--------------------------------------------------------------------------------------------------------------------------------------------------------------------------------------------------|--------------------------------|
|           |        |     |                                                           |                               |              |                     |                | grandmother colon 37                                                                                                                                                                             |                                |
| 4274      | Female | 48  | Metachronous gastric cancer 48. Known mutation in family. | Deficient                     | <i>MSH2</i>  | c.1477C>T           | p.Q493X        | Father <sup>a</sup> pancreatic 50; Brother bile duct 37, colon 43; Pat. aunt 1 breast 58; Pat. aunt 2 colon 38; Pat. aunt 3 <sup>a</sup> colon 46, 60, gallbladder 68; Pat. grandmother colon 70 | Y                              |
| 366413    | Male   | 48  | Synchronous primaries (3).                                | Deficient                     | <i>MSH2</i>  | c.2096C>A           | p.S699X        | Mother endometrial 34, colon 45, kidney 62; Father colon 68; Mat. aunt leukemia 65; Pat. uncle colon 50s; Pat. grandmother endometrial 50s                                                       | Y                              |
| 404530    | Male   | 48  | Known mutation in family.                                 | Deficient                     | <i>MSH2</i>  | c.942+3A>T          |                | Mother <sup>a</sup> colon 44, bladder 60; Mat. grandmother breast 71, endometrial 71                                                                                                             | Y                              |
| 362971    | Male   | 48  | Known mutation in family. Ashkenazi Jewish ancestry.      | Proficient                    | <i>BRCA2</i> | c.5946del           | p.S1982Rfs*22  | Mother breast 48; Brother polyps 40s; Mat. uncle colon 50s; 2 Mat. aunts ovarian; Mat. grandfather pancreatic 78                                                                                 | Y                              |
| 440679    | Male   | 48  |                                                           | Proficient                    | <i>MUTYH</i> | c.1187G>A           | p.G396D        | None <sup>c</sup>                                                                                                                                                                                | N <sup>d</sup>                 |
| 423526    | Female | 49  |                                                           | Deficient                     | <i>MSH2</i>  | exon 13-14 deletion |                | None                                                                                                                                                                                             | Y                              |
| 443029    | Male   | 49  |                                                           | Deficient                     | <i>MSH2</i>  | exon 3-16 deletion  |                | Mother <sup>a</sup> colon 35; Brother 1 colon 51; Brother 2 colon 39                                                                                                                             | Y                              |
| 366298    | Male   | 49  | Polyposis. Synchronous bilateral renal cell cancers.      | Deficient                     | <i>MUTYH</i> | c.536A>G            | p.Y179C        | None                                                                                                                                                                                             | Y                              |
|           |        |     |                                                           |                               | <i>MUTYH</i> | c.1187G>A           | p.G396D        |                                                                                                                                                                                                  |                                |
| 423828    | Male   | 49  |                                                           | Deficient                     | <i>PMS2</i>  | c.215G>A            | p.G72E         | Father <sup>a</sup> colon 58                                                                                                                                                                     | Y                              |
| 363017    | Female | 49  | Attenuated polyposis.                                     | Proficient                    | <i>APC</i>   | c.1213C>T           | p.R405X        | None                                                                                                                                                                                             | Y                              |
| 410867    | Female | 49  | 4 adenomas.                                               | Proficient                    | <i>MUTYH</i> | c.536A>G            | p.Y179C        | Brother colon 42 (MMR proficient, non-polyposis); Father colon 59; Pat.                                                                                                                          | N                              |
|           |        |     |                                                           |                               | <i>MUTYH</i> | c.1187G>A           | p.G396D        |                                                                                                                                                                                                  |                                |

**eTable 3. Genotypes and Phenotypes of Patients with a Hereditary Cancer Syndrome**

| Patient # | Sex | Age | Clinical history | MMR tumor status <sup>f</sup> | Gene | Nucleotide change | Protein change | Family history <sup>b</sup>   | Met NCCN criteria <sup>g</sup> |
|-----------|-----|-----|------------------|-------------------------------|------|-------------------|----------------|-------------------------------|--------------------------------|
|           |     |     |                  |                               |      |                   |                | grandfather colon age unknown |                                |

Abbreviations: MMR, mismatch repair; NCCN, National Comprehensive Cancer Network; Mat, Maternal; Pat, Paternal

<sup>a</sup>Indicates mutation carrier, when known

<sup>b</sup>First- and second-degree relatives

<sup>c</sup>Second-degree relative cancer history unavailable

<sup>d</sup>NCCN testing criteria nonexistent for monoallelic *MUTYH* or *APC* p.I1307K, patient did not meet NCCN testing criteria for *APC* or *MUTYH* (polyposis)

<sup>e</sup>NCCN testing criteria nonexistent, patient did not meet NCCN testing criteria for *BRCA1/2*

<sup>f</sup>MMR deficient tumor = microsatellite instability and/or abnormal immunohistochemistry, MMR proficient tumor = microsatellite stability and/or normal immunohistochemistry

<sup>g</sup>For the gene in which they were found to have a mutation

**eTable 4. Patients Explained by Double Somatic Mutations**

| Patient # | Sex    | Age | MSI   | MLH1-hm | IHC                   | Germline pathogenic mutation(s) | MMR somatic tumor testing                           | Family cancer history (FDRs)                                  | Conclusion                                            |
|-----------|--------|-----|-------|---------|-----------------------|---------------------------------|-----------------------------------------------------|---------------------------------------------------------------|-------------------------------------------------------|
| 362933    | Female | 37  | MSI-H | Absent  | Absent MLH1/PMS2      | None                            | <i>MLH1</i> c.790+5 G>A plus LOH                    | Mother pancreatic neuroendocrine 58                           | Double somatic                                        |
| 363002    | Male   | 41  | MSI-H | Absent  | Absent MLH1/PMS2      | None                            | <i>MLH1</i> c.178C>T, p.Q60X plus LOH               | Mother breast 56                                              | Double somatic                                        |
| 426745    | Male   | 45  | MSI-H | Absent  | Absent MLH1/PMS2      | None                            | <i>MLH1</i> c.439G>A, p.G147R plus LOH              | Mother colon 67, melanoma 67                                  | Double somatic                                        |
| 366535    | Male   | 40  | MSI-H | Absent  | Absent PMS2 only      | None                            | <i>MLH1</i> c.2248_2253dup, p.Y750_K751dup plus LOH | None                                                          | Double somatic                                        |
| 426966    | Male   | 46  | MSI-H | Absent  | Weak MSH2/absent MSH6 | None                            | <i>MSH6</i> c.718C>T, p.R240X                       | Mother colon 72                                               | Double somatic                                        |
|           |        |     |       |         |                       |                                 | <i>MSH6</i> c.3261dupC, p.F1088Lfs*5                |                                                               |                                                       |
| 448651    | Male   | 40  | MSI-H | Absent  | Absent MSH2/weak MSH6 | None                            | <i>MSH2</i> c.1865C>T, p.P622L                      | None                                                          | Double somatic                                        |
|           |        |     |       |         |                       |                                 | <i>MSH2</i> c.1662-2A>G                             |                                                               |                                                       |
| 400308    | Female | 40  | MSI-H | Absent  | Absent MLH1/PMS2      | None                            | <i>MLH1</i> <sup>a</sup> c.1646T>C, p.L549P         | Sister skin 39                                                | Likely double somatic                                 |
|           |        |     |       |         |                       |                                 | <i>MLH1</i> <sup>a</sup> c.562G>A, p.A188T          |                                                               |                                                       |
| 362938    | Male   | 39  | MSI-H | Absent  | Weak MLH1/absent PMS2 | <i>MUTYH</i> c.1187G>A, p.G396D | <i>MLH1</i> c.2135G>A, p.W712X                      | Father skin 74; Brother adenomas 20s; Maternal uncle colon 63 | Double somatic and <i>MUTYH</i> -associated polyposis |
|           |        |     |       |         |                       |                                 | <i>MUTYH</i> c.698G>A, p.G233D                      |                                                               |                                                       |
| 366298    | Male   | 49  | MSI-H | Absent  | Absent                | <i>MUTYH</i>                    | <i>MLH1</i> c.677G>A,                               | None                                                          | Double                                                |

**eTable 4. Patients Explained by Double Somatic Mutations**

| Patient # | Sex | Age | MSI | MLH1-hm | IHC       | Germline pathogenic mutation(s)                               | MMR somatic tumor testing | Family cancer history (FDRs) | Conclusion                                     |
|-----------|-----|-----|-----|---------|-----------|---------------------------------------------------------------|---------------------------|------------------------------|------------------------------------------------|
|           |     |     |     |         | MLH1/PMS2 | c.536A>G,<br>p.Y179C<br><i>MUTYH</i><br>c.1187G>A,<br>p.G396D | p.R226Q plus LOH          |                              | somatic and <i>MUTYH</i> -associated polyposis |

Abbreviations: MMR, mismatch repair; MSI-H, high microsatellite instability; MSS, microsatellite stability; hm, hypermethylation; IHC, immunohistochemistry; LOH, loss of heterozygosity; FDR, first-degree relative

<sup>a</sup>Variant of uncertain significance
